# Supplementary material
Source: MDPI journal article supplement (https://www.mdpi.com/2673-8007/1/1/10)
Supplement: s1 [file s1]

# Short-Term Effect of Green Waste and Sludge Amendment on Soil Microbial Diversity and Volatile Organic Compound Emissions—Supplementary material

Letizia Abis <sup>1,2,\*,†</sup>, Sophie Sadet-Bourgeteau <sup>3</sup>, Benjamin Lebrun <sup>3</sup>, Raluca Ciuraru <sup>2</sup>, Florence Lafouge <sup>2</sup>, Virginie Nowak <sup>3</sup>, Julie Tripied <sup>3</sup>, Sabine Houot <sup>2</sup>, Pierre Alain Maron <sup>3</sup> and Benjamin Loubet <sup>2</sup>

<sup>1</sup> Environmental Science Department, Sorbonne Université UPMC, 75006 Paris, France

<sup>2</sup> INRAE, UMR ECOSYS, INRAE, AgroParisTech, Université Paris-Saclay, 78850 Thiverval-Grignon, France; raluca.ciuraru@inrae.fr (R.C.); florence.lafouge@inrae.fr (F.L.); sabine.houot@inrae.fr (S.H.); benjamin.loubet@inrae.fr (B.L.)

<sup>3</sup> INRAE, UMR AgroEcologie, AgroSup Dijon, BP 87999, CEDEX, 21079 Dijon, France; sophie.bourgeteau-sadet@agrosupdijon.fr (S.S.-B.); Benjamin.Lebrun@inrae.fr (B.L.); virginie.nowak@inrae.fr (V.N.); julie.tripied@inrae.fr (J.T.); pierre-alain.maron@inrae.fr (P.A.M.)

† Now working at: Technische Universität Berlin, Umweltchemie und Lufttrinhaltung, Straße des 17. Juni 135, 10623 Berlin, Germany.

\* Correspondence: Letizia.abis@tu-berlin.de

a) CN

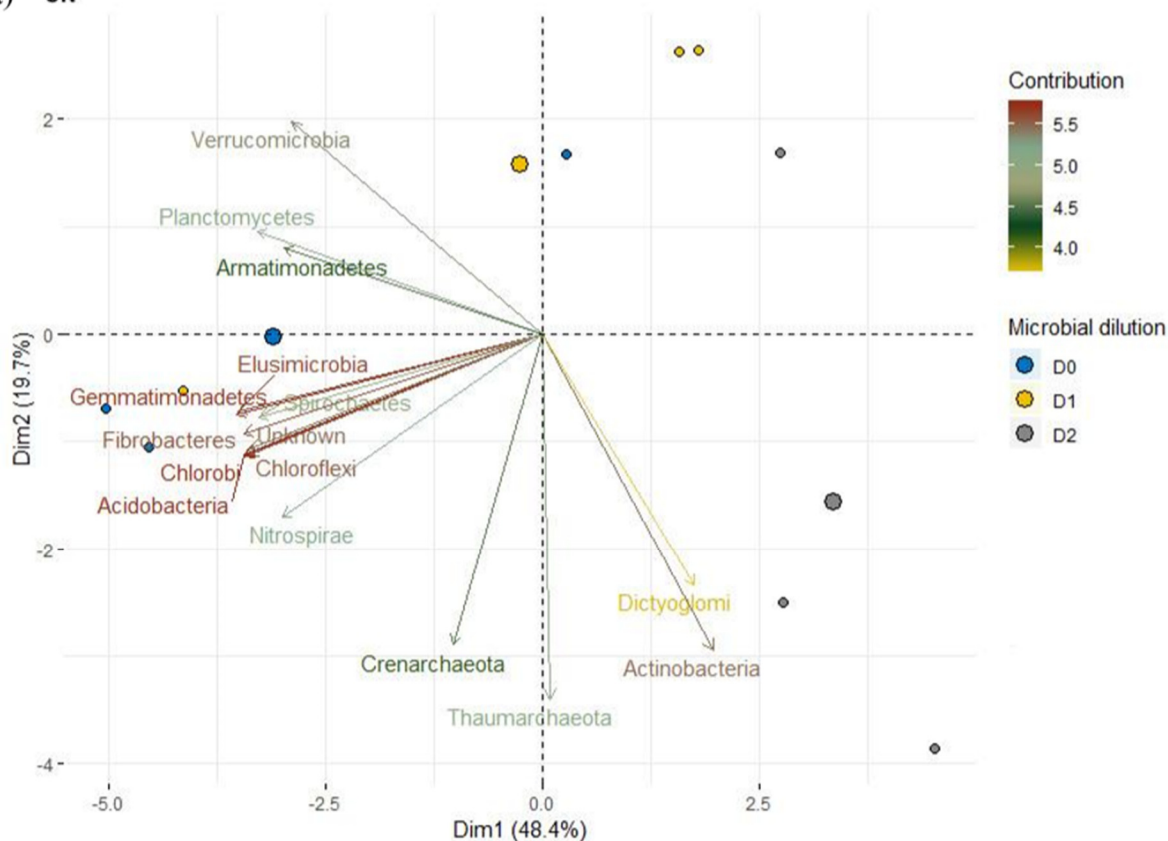

b) CN+GWS

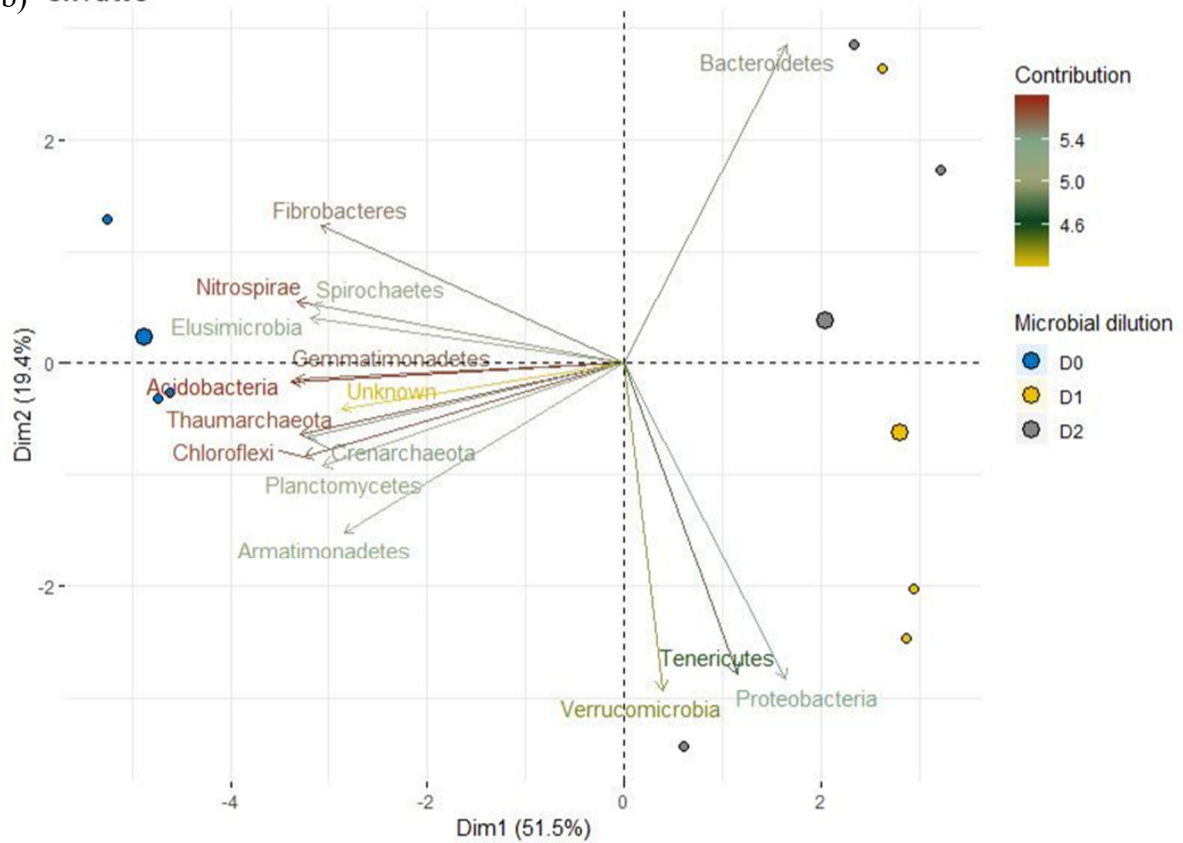

**Figure S1.** Comparison of the microbial structure before (CN samples) and after GWS amendment (CN+GWS). a) Microbial community structure of CN samples. b) Microbial structure for the CN+GWS. D0= microbial dilution diversity equal to 1, D1= microbial dilution diversity equal to  $10^{-3}$ , D2= microbial dilution diversity equal to  $10^{-5}$ .

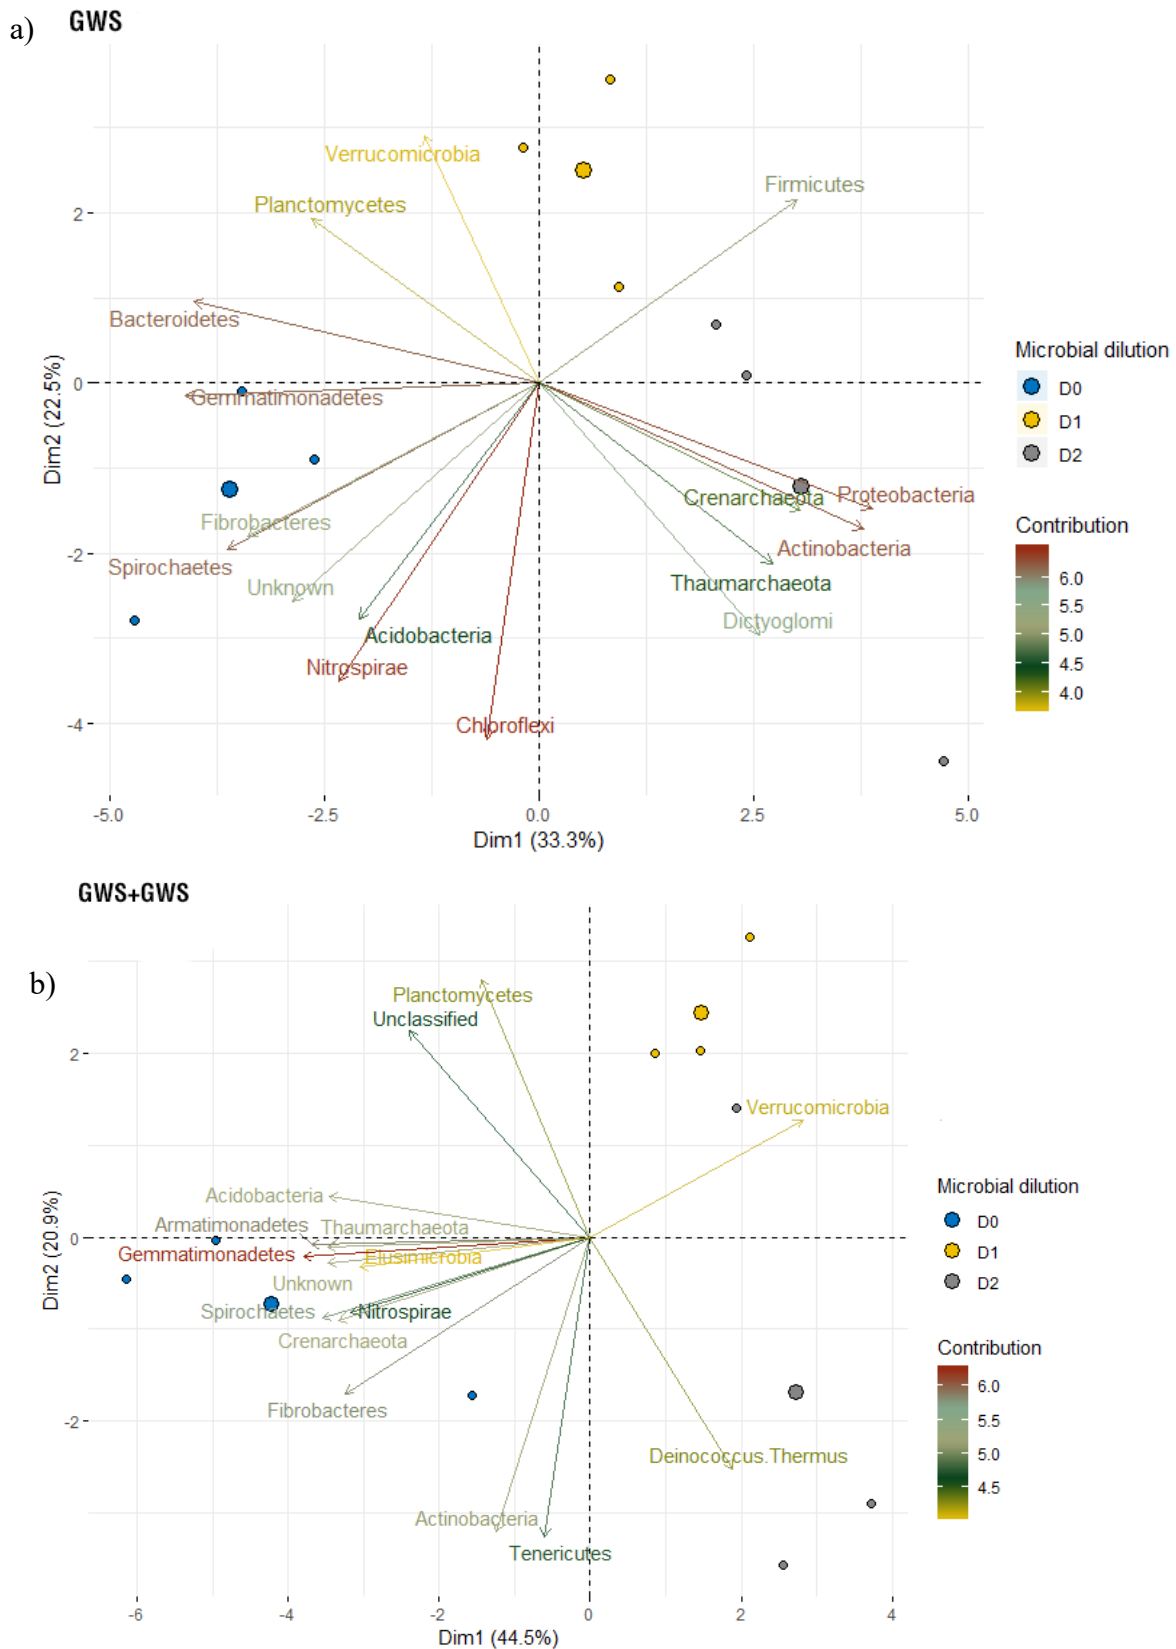

**Figure S2.** Comparison of the microbial structure before (GWS samples) and after GWS amendment (GWS+GWS). a) Microbial community structure of GWS samples. b) Microbial structure for the GWS+GWS. D0= microbial dilution diversity equal to  $10^{-3}$ , D1= microbial dilution diversity equal to  $10^{-4}$ , D2= microbial dilution diversity equal to  $10^{-5}$ .

**Table S1.** Type of samples and perform analysis. CN= control without organic inputs, CN+GWS= control without organic input with the addition of GWS amendment, GWS= green waste and sludge samples, GWS+GWS= green waste and sludge samples with the addition.

| Type of sample | Number of samples | Microbial analysis                   | VOCs detection                         |
|----------------|-------------------|--------------------------------------|----------------------------------------|
| CN             | 9                 |                                      | NA (sacrificed for microbial analysis) |
| CN+GWS         | 9                 | -Shannon index<br>-Microbial biomass | During 49 h                            |
| GWS            | 9                 | -Bacterial relative abundance        | NA (sacrificed for microbial analysis) |
| GWS+GWS        | 9                 |                                      | During 49 h                            |

**Table S2.** List of the 20 most emitted compound before the amendment with fresh GWS on CN soil samples, ND= not detected.

| CN_T0    |                                              |                                                                                        |                                                                                         |                   |                   |                                    |      |      |
|----------|----------------------------------------------|----------------------------------------------------------------------------------------|-----------------------------------------------------------------------------------------|-------------------|-------------------|------------------------------------|------|------|
| m/z      | Formula                                      | Tentative Identification                                                               | Mean emission $\pm$ sd<br>(nmol s <sup>-1</sup> g <sup>-1</sup> (DW)) x 10 <sup>4</sup> |                   |                   | Percentage Contribution<br>(% mol) |      |      |
|          |                                              |                                                                                        | D0                                                                                      | D1                | D2                | D0                                 | D1   | D2   |
| 121.0983 | C <sub>9</sub> H <sub>12</sub>               | Propylbenzene<br>cumene<br>mesytilene<br>1,3,5-trimethylbenzene,<br>Phenilacetaldehyde | 0,398 $\pm$ 0,533                                                                       | 0,284 $\pm$ 0,144 | 0,353 $\pm$ 0,084 | 40,5                               | 31,7 | 33,1 |
| 93.0682  | C <sub>8</sub> H <sub>7</sub>                | Toluene                                                                                | 0,259 $\pm$ 0,138                                                                       | 0,230 $\pm$ 0,039 | 0,418 $\pm$ 0,067 | 26,3                               | 25,7 | 39,2 |
| 107.0872 | C <sub>8</sub> H <sub>10</sub>               | Ethylbenzene                                                                           | 0,083 $\pm$ 0,045                                                                       | 0,061 $\pm$ 0,016 | 0,024 $\pm$ 0,030 | 8,4                                | 6,8  | 2,3  |
| 135.1185 | C <sub>10</sub> H <sub>14</sub>              | p-cymene                                                                               | 0,018 $\pm$ 0,008                                                                       | 0,022 $\pm$ 0,010 | 0,007 $\pm$ 0,003 | 1,8                                | 2,5  | 0,7  |
| 122.1006 | C <sub>8</sub> H <sub>11</sub> N             | Benzenamine/2,6-Xylidine                                                               | 0,018 $\pm$ 0,002                                                                       | 0,018 $\pm$ 0,002 | 0,015 $\pm$ 0,003 | 1,8                                | 2,0  | 1,4  |
| 121.0998 |                                              |                                                                                        | 0,016 $\pm$ 0,003                                                                       | 0,029 $\pm$ 0,019 | 0,003 $\pm$ 0,008 | 1,6                                | 3,2  | 0,3  |
| 79.0501  | C <sub>6</sub> H <sub>6</sub>                | Benzene                                                                                | 0,016 $\pm$ 0,001                                                                       | 0,017 $\pm$ 0,000 | 0,017 $\pm$ 0,001 | 1,6                                | 1,9  | 1,6  |
| 120.0961 | C <sub>8</sub> H <sub>9</sub> N              |                                                                                        | 0,016 $\pm$ 0,021                                                                       | 0,019 $\pm$ 0,010 | 0,015 $\pm$ 0,003 | 1,6                                | 2,1  | 1,4  |
| 105.0682 | C <sub>5</sub> H <sub>12</sub> S             |                                                                                        | 0,015 $\pm$ 0,017                                                                       | 0,022 $\pm$ 0,008 | 0,000 $\pm$ 0,007 | 1,5                                | 2,5  | ND   |
| 91.0561  | C <sub>4</sub> H <sub>10</sub> S             | Diethyl sulphide                                                                       | 0,015 $\pm$ 0,017                                                                       | 0,022 $\pm$ 0,007 | 0,000 $\pm$ 0,008 | 1,5                                | 2,5  | ND   |
| 43.0535  |                                              |                                                                                        | 0,013 $\pm$ 0,011                                                                       | 0,020 $\pm$ 0,011 | 0,007 $\pm$ 0,006 | 1,3                                | 2,2  | 0,7  |
| 108.0863 | C <sub>7</sub> H <sub>9</sub> N              | Dimethyl pyridine                                                                      | 0,012 $\pm$ 0,001                                                                       | 0,005 $\pm$ 0,003 | 0,010 $\pm$ 0,004 | 1,2                                | 0,6  | 0,9  |
| 91.0689  | C <sub>4</sub> H <sub>10</sub> S             | Diethyl sulphide                                                                       | 0,007 $\pm$ 0,010                                                                       | 0,016 $\pm$ 0,001 | 0,031 $\pm$ 0,006 | 0,7                                | 1,8  | 2,9  |
| 136.1176 | C <sub>7</sub> H <sub>5</sub> NS             | Benzothiazole                                                                          | 0,006 $\pm$ 0,004                                                                       | 0,007 $\pm$ 0,007 | 0,009 $\pm$ 0,009 | 0,6                                | 0,8  | 0,8  |
| 95.0431  | C <sub>2</sub> H <sub>6</sub> S <sub>2</sub> | Dimethyl disulfide                                                                     | 0,005 $\pm$ 0,001                                                                       | 0,007 $\pm$ 0,002 | 0,006 $\pm$ 0,001 | 0,5                                | 0,8  | 0,6  |
| 89.0585  | C <sub>4</sub> H <sub>8</sub> O <sub>2</sub> | Ethyl acetate/Butanoic acid/Acetoin                                                    | 0,005 $\pm$ 0,001                                                                       | 0,007 $\pm$ 0,002 | 0,006 $\pm$ 0,001 | 0,5                                | 0,8  | 0,6  |
| 92.0591  | C <sub>6</sub> H <sub>5</sub> N              |                                                                                        | 0,004 $\pm$ 0,003                                                                       | 0,005 $\pm$ 0,001 | 0,005 $\pm$ 0,000 | 0,4                                | 0,6  | 0,5  |
| 109.0632 | C <sub>8</sub> H <sub>6</sub> O              | Benzofuran                                                                             | 0,004 $\pm$ 0,002                                                                       | 0,009 $\pm$ 0,001 | 0,010 $\pm$ 0,001 | 0,4                                | 1,0  | 0,9  |
| 158.1572 | C <sub>9</sub> H <sub>19</sub> NO            |                                                                                        | 0,003 $\pm$ 0,002                                                                       | 0,003 $\pm$ 0,001 | 0,007 $\pm$ 0,001 | 0,3                                | 0,3  | 0,7  |
| 95.0821  | C <sub>5</sub> H <sub>6</sub> N <sub>2</sub> | Methyl pyrazine                                                                        | 0,003 $\pm$ 0,001                                                                       | 0,005 $\pm$ 0,002 | 0,005 $\pm$ 0,001 | 0,3                                | 0,6  | 0,5  |

**Table S3.** List of the 20 most emitted compound 49 hours after the amendment with fresh GWS on CN soil samples.

| CN_T9    |                                                |                                                                                        |                                                                                         |                   |                   |                                    |      |      |
|----------|------------------------------------------------|----------------------------------------------------------------------------------------|-----------------------------------------------------------------------------------------|-------------------|-------------------|------------------------------------|------|------|
| m/z      | Formula                                        | Tentative Identification                                                               | Mean emission $\pm$ sd<br>(nmol s <sup>-1</sup> g <sup>-1</sup> (DW)) x 10 <sup>4</sup> |                   |                   | Percentage contribution<br>(% mol) |      |      |
|          |                                                |                                                                                        | D0 $\pm$ sd                                                                             | D1 $\pm$ sd       | D2 $\pm$ sd       | D0                                 | D1   | D2   |
| 121.0983 | C <sub>9</sub> H <sub>12</sub>                 | Propylbenzene<br>cumene<br>mesytilene<br>1,3,5-trimethylbenzene,<br>Phenilacetaldheyde | 4,574 $\pm$ 5,397                                                                       | 4,539 $\pm$ 2,126 | 6,514 $\pm$ 1,827 | 33,4                               | 31,1 | 30,6 |
| 93.0682  | C <sub>8</sub> H <sub>7</sub>                  | Toluene                                                                                | 2,505 $\pm$ 2,818                                                                       | 2,621 $\pm$ 1,129 | 3,580 $\pm$ 1,056 | 18,3                               | 18,0 | 16,8 |
| 107.0872 | C <sub>8</sub> H <sub>10</sub>                 | Ethylbenzene                                                                           | 2,457 $\pm$ 2,791                                                                       | 2,574 $\pm$ 1,084 | 3,523 $\pm$ 1,060 | 18,0                               | 17,6 | 16,5 |
| 122.1009 | C <sub>8</sub> H <sub>11</sub> N               | Benzenamine/2,6-Xylidine                                                               | 0,913 $\pm$ 0,950                                                                       | 0,974 $\pm$ 0,433 | 1,345 $\pm$ 0,348 | 6,7                                | 6,7  | 6,3  |
| 79.0701  | C <sub>6</sub> H <sub>6</sub>                  | Benzene                                                                                | 0,794 $\pm$ 0,993                                                                       | 0,808 $\pm$ 0,419 | 1,119 $\pm$ 0,340 | 5,8                                | 5,5  | 5,3  |
| 119.0818 | C <sub>8</sub> H <sub>6</sub> O                |                                                                                        | 0,407 $\pm$ 0,621                                                                       | 0,738 $\pm$ 0,341 | 1,764 $\pm$ 0,160 | 3,0                                | 5,1  | 8,3  |
| 136.0226 |                                                |                                                                                        | 0,368 $\pm$ 0,410                                                                       | 0,527 $\pm$ 0,213 | 0,657 $\pm$ 0,210 | 2,7                                | 3,6  | 3,1  |
| 94.0707  |                                                |                                                                                        | 0,319 $\pm$ 0,382                                                                       | 0,296 $\pm$ 0,147 | 0,428 $\pm$ 0,136 | 2,3                                | 2,0  | 2,0  |
| 105.0686 |                                                |                                                                                        | 0,239 $\pm$ 0,090                                                                       | 0,140 $\pm$ 0,048 | 0,303 $\pm$ 0,026 | 1,7                                | 1,0  | 1,4  |
| 105.0676 |                                                |                                                                                        | 0,148 $\pm$ 0,116                                                                       | 0,115 $\pm$ 0,082 | 0,257 $\pm$ 0,107 | 1,1                                | 0,8  | 1,2  |
| 136.1176 | C <sub>7</sub> H <sub>5</sub> NS               | Benzothiazole                                                                          | 0,075 $\pm$ 0,064                                                                       | 0,075 $\pm$ 0,037 | 0,118 $\pm$ 0,010 | 0,5                                | 0,5  | 0,6  |
| 95.0431  | C <sub>2</sub> H <sub>6</sub> S <sub>2</sub>   | Dimethyl disulfide                                                                     | 0,055 $\pm$ 0,046                                                                       | 0,063 $\pm$ 0,026 | 0,081 $\pm$ 0,018 | 0,4                                | 0,4  | 0,4  |
| 95.0516  | C <sub>6</sub> H <sub>6</sub> O                | Phenol                                                                                 | 0,048 $\pm$ 0,032                                                                       | 0,059 $\pm$ 0,051 | 0,034 $\pm$ 0,021 | 0,4                                | 0,4  | 0,2  |
| 58.0708  | C <sub>4</sub> H <sub>9</sub>                  |                                                                                        | 0,047 $\pm$ 0,060                                                                       | 0,065 $\pm$ 0,027 | 0,081 $\pm$ 0,024 | 0,3                                | 0,4  | 0,4  |
| 95.0279  | C <sub>2</sub> H <sub>6</sub> O <sub>2</sub> S |                                                                                        | 0,041 $\pm$ 0,036                                                                       | 0,051 $\pm$ 0,019 | 0,063 $\pm$ 0,015 | 0,3                                | 0,3  | 0,3  |
| 111.0424 | C <sub>7</sub> H <sub>10</sub> O               | 2,3,5-trimethyl- Furan                                                                 | 0,037 $\pm$ 0,036                                                                       | 0,051 $\pm$ 0,020 | 0,054 $\pm$ 0,009 | 0,3                                | 0,3  | 0,3  |
| 123.1114 |                                                |                                                                                        | 0,037 $\pm$ 0,022                                                                       | 0,037 $\pm$ 0,047 | 0,022 $\pm$ 0,030 | 0,3                                | 0,3  | 0,1  |
| 123.0727 | C <sub>8</sub> H <sub>11</sub> O               |                                                                                        | 0,033 $\pm$ 0,043                                                                       | 0,047 $\pm$ 0,019 | 0,061 $\pm$ 0,016 | 0,2                                | 0,3  | 0,3  |
| 106.075  | C <sub>8</sub> H <sub>9</sub>                  |                                                                                        | 0,030 $\pm$ 0,002                                                                       | 0,022 $\pm$ 0,008 | 0,039 $\pm$ 0,013 | 0,2                                | 0,2  | 0,2  |
| 92.074   | C <sub>6</sub> H <sub>5</sub> N                |                                                                                        | 0,022 $\pm$ 0,027                                                                       | 0,031 $\pm$ 0,013 | 0,038 $\pm$ 0,015 | 0,2                                | 0,2  | 0,2  |

**Table S4.** List of the 20 most emitted compound before the amendment with fresh GWS on GWS soil samples.

| GWS_T0   |                                  |                                                                                        |                                                                                         |                   |                    |                                 |      |      |
|----------|----------------------------------|----------------------------------------------------------------------------------------|-----------------------------------------------------------------------------------------|-------------------|--------------------|---------------------------------|------|------|
| m/z      | Formula                          | Tentative Identification                                                               | Mean emission $\pm$ sd<br>(nmol s <sup>-1</sup> g <sup>-1</sup> (DW)) x 10 <sup>4</sup> |                   |                    | Percentage Contribution (% mol) |      |      |
|          |                                  |                                                                                        | D0                                                                                      | D1                | D2                 | D0                              | D1   | D2   |
| 121.0983 | C <sub>9</sub> H <sub>12</sub>   | Propylbenzene<br>cumene<br>mesytilene<br>1,3,5-trimethylbenzene,<br>Phenilacetaldheyde | 8,192 $\pm$ 3,199                                                                       | 7,093 $\pm$ 6,159 | 10,882 $\pm$ 2,652 | 54,2                            | 52,8 | 54,1 |
| 93.0682  | C <sub>8</sub> H <sub>7</sub>    | Toluene                                                                                | 2,171 $\pm$ 0,670                                                                       | 1,949 $\pm$ 1,673 | 2,959 $\pm$ 0,766  | 14,4                            | 14,5 | 14,7 |
| 107.0872 | C <sub>8</sub> H <sub>10</sub>   | Ethylbenzene                                                                           | 1,734 $\pm$ 0,463                                                                       | 1,416 $\pm$ 1,247 | 2,222 $\pm$ 0,548  | 11,5                            | 10,5 | 11,1 |
| 122.1009 | C <sub>8</sub> H <sub>11</sub> N | Benzenamine/2,6-Xylidine                                                               | 0,794 $\pm$ 0,293                                                                       | 0,688 $\pm$ 0,631 | 1,065 $\pm$ 0,260  | 5,2                             | 5,1  | 5,3  |
| 79.0701  | C <sub>6</sub> H <sub>6</sub>    | Benzene                                                                                | 0,257 $\pm$ 0,074                                                                       | 0,172 $\pm$ 0,147 | 0,240 $\pm$ 0,074  | 1,7                             | 1,3  | 1,2  |
| 119.0818 | C <sub>8</sub> H <sub>6</sub> O  |                                                                                        | 0,220 $\pm$ 0,112                                                                       | 0,184 $\pm$ 0,201 | 0,313 $\pm$ 0,096  | 1,5                             | 1,4  | 1,6  |
| 136.0226 | C <sub>7</sub> H <sub>5</sub> NS | Benzothiazole                                                                          | 0,211 $\pm$ 0,039                                                                       | 0,246 $\pm$ 0,037 | 0,363 $\pm$ 0,027  | 1,4                             | 1,8  | 1,8  |
| 94.0707  |                                  |                                                                                        | 0,122 $\pm$ 0,047                                                                       | 0,106 $\pm$ 0,108 | 0,171 $\pm$ 0,050  | 0,8                             | 0,8  | 0,9  |
| 105.0686 |                                  |                                                                                        | 0,120 $\pm$ 0,108                                                                       | 0,078 $\pm$ 0,215 | 0,198 $\pm$ 0,100  | 0,8                             | 0,6  | 1,0  |

|          |         |                        |             |             |             |     |     |     |
|----------|---------|------------------------|-------------|-------------|-------------|-----|-----|-----|
| 105.0676 |         |                        | 0,117±0,108 | 0,076±0,217 | 0,201±0,099 | 0,8 | 0,6 | 1,0 |
| 136.1176 | C7H5NS  | Benzothiazole          | 0,093±0,049 | 0,082±0,077 | 0,121±0,036 | 0,6 | 0,6 | 0,6 |
| 95.0431  | C2H6S2  | Dimethyl disulfide     | 0,083±0,007 | 0,085±0,018 | 0,085±0,009 | 0,5 | 0,6 | 0,4 |
| 95.0516  | C6H6O   | Phenol                 | 0,079±0,008 | 0,077±0,021 | 0,084±0,010 | 0,5 | 0,6 | 0,4 |
| 58.0708  | C4H9    |                        | 0,066±0,005 | 0,071±0,014 | 0,092±0,005 | 0,4 | 0,5 | 0,5 |
| 95.0279  | C2H6O2S |                        | 0,066±0,003 | 0,082±0,008 | 0,067±0,010 | 0,4 | 0,6 | 0,3 |
| 111.0424 | C7H10O  | 2,3,5-trimethyl- Furan | 0,054±0,005 | 0,071±0,016 | 0,063±0,006 | 0,4 | 0,5 | 0,3 |
| 123.1114 |         |                        | 0,054±0,012 | 0,047±0,022 | 0,061±0,011 | 0,4 | 0,3 | 0,3 |
| 123.0727 | C8H11O  |                        | 0,050±0,011 | 0,050±0,019 | 0,062±0,012 | 0,3 | 0,4 | 0,3 |
| 106.075  | C8H9    |                        | 0,049±0,019 | 0,037±0,045 | 0,064±0,022 | 0,3 | 0,3 | 0,3 |
| 92.074   | C6H5N   |                        | 0,038±0,006 | 0,034±0,016 | 0,051±0,006 | 0,3 | 0,3 | 0,3 |

**Table S5.** List of the 20 most emitted compound 49 hours after the amendment with fresh GWS on GWS soil samples.

| GWS_T9   |                                                |                                                                                        |                                                                                     |             |              |                                 |      |      |
|----------|------------------------------------------------|----------------------------------------------------------------------------------------|-------------------------------------------------------------------------------------|-------------|--------------|---------------------------------|------|------|
| m/z      | Formula                                        | Tentative Identification                                                               | Mean emission ± sd<br>(nmol s <sup>-1</sup> g <sup>-1</sup> (DW)) x 10 <sup>4</sup> |             |              | Percentage Contribution (% mol) |      |      |
|          |                                                |                                                                                        | D0                                                                                  | D1          | D2           | D0                              | D1   | D2   |
| 121.0983 | C <sub>9</sub> H <sub>12</sub>                 | Propylbenzene<br>cumene<br>mesitylene<br>1,3,5-trimethylbenzene,<br>Phenylacetaldehyde | 8,172±3,142                                                                         | 7,443±4,172 | 10,421±1,322 | 52,5                            | 50,6 | 52,4 |
| 93.0682  | C <sub>8</sub> H <sub>7</sub>                  | Toluene                                                                                | 2,661±0,893                                                                         | 1,949±1,673 | 2,959±0,766  | 13,9                            | 13,9 | 14,2 |
| 107.0872 | C <sub>8</sub> H <sub>10</sub>                 | Ethylbenzene                                                                           | 1,734±0,463                                                                         | 1,416±1,247 | 2,222±0,548  | 11,1                            | 10,1 | 10,7 |
| 122.1045 | C <sub>8</sub> H <sub>11</sub> N               | Benzenamine/2,6-Xylidine                                                               | 0,824±0,295                                                                         | 0,692±0,636 | 1,081±0,268  | 5,3                             | 4,9  | 5,2  |
| 91.0694  |                                                |                                                                                        | 0,559±0,063                                                                         | 0,521±0,158 | 0,772±0,136  | 3,6                             | 3,7  | 3,7  |
| 79.0701  | C <sub>6</sub> H <sub>6</sub>                  | Benzene                                                                                | 0,257±0,074                                                                         | 0,172±0,147 | 0,240±0,074  | 1,6                             | 1,2  | 1,2  |
| 119.0818 | C <sub>8</sub> H <sub>6</sub> O                |                                                                                        | 0,220±0,112                                                                         | 0,184±0,201 | 0,313±0,096  | 1,4                             | 1,3  | 1,5  |
| 136.0226 | C <sub>7</sub> H <sub>5</sub> NS               | Benzothiazole                                                                          | 0,211±0,039                                                                         | 0,244±0,037 | 0,364±0,025  | 1,4                             | 1,8  | 1,7  |
| 93.0354  |                                                |                                                                                        | 0,151±0,062                                                                         | 0,253±0,148 | 0,150±0,018  | 1,0                             | 1,8  | 0,7  |
| 94.0707  |                                                |                                                                                        | 0,122±0,047                                                                         | 0,106±0,108 | 0,171±0,050  | 0,8                             | 0,8  | 0,8  |
| 108.0851 | C <sub>7</sub> H <sub>9</sub> N                | Dimethyl pyridine                                                                      | 0,118±0,034                                                                         | 0,098±0,088 | 0,156±0,043  | 0,8                             | 0,7  | 0,8  |
| 136.1176 | C <sub>10</sub> H <sub>15</sub>                |                                                                                        | 0,093±0,049                                                                         | 0,082±0,077 | 0,121±0,036  | 0,6                             | 0,6  | 0,6  |
| 95.0516  | C <sub>6</sub> H <sub>6</sub> O                | Phenol                                                                                 | 0,079±0,008                                                                         | 0,077±0,021 | 0,084±0,010  | 0,5                             | 0,5  | 0,4  |
| 58.0708  | C <sub>4</sub> H <sub>9</sub>                  |                                                                                        | 0,066±0,005                                                                         | 0,071±0,014 | 0,092±0,005  | 0,4                             | 0,5  | 0,4  |
| 95.0279  | C <sub>2</sub> H <sub>6</sub> O <sub>2</sub> S |                                                                                        | 0,066±0,003                                                                         | 0,082±0,008 | 0,067±0,010  | 0,4                             | 0,6  | 0,3  |
| 123.1114 |                                                |                                                                                        | 0,054±0,012                                                                         | 0,050±0,019 | 0,062±0,012  | 0,3                             | 0,3  | 0,3  |
| 123.0727 | C <sub>8</sub> H <sub>11</sub> O               |                                                                                        | 0,050±0,011                                                                         | 0,037±0,045 | 0,064±0,022  | 0,3                             | 0,4  | 0,3  |
| 106.075  | C <sub>8</sub> H <sub>9</sub>                  |                                                                                        | 0,042±0,017                                                                         | 0,047±0,019 | 0,070±0,011  | 0,3                             | 0,3  | 0,3  |
| 92.0565  | C <sub>6</sub> H <sub>5</sub> N                |                                                                                        | 0,046±0,012                                                                         | 0,034±0,016 | 0,051±0,006  | 0,3                             | 0,3  | 0,3  |
| 92.074   |                                                |                                                                                        | 0,038±0,006                                                                         | 0,040±0,004 | 0,038±0,005  | 0,2                             | 0,2  | 0,2  |
